# Supplementary material for: Safety, tolerability and appropriate use of nintedanib in idiopathic pulmonary fibrosis
Source: Springer Nature journal article supplement (doi:10.1186/s12931-015-0276-5), 2015-09-24
Supplement: MOESM1 [file 9759792]

## Safety, tolerability and appropriate use of nintedanib in idiopathic pulmonary fibrosis

### Additional files

Additional file 1

Baseline conditions and therapies in the INPULSIS® trials

Table

|                                                  | <b>Nintedanib<br/>(n = 638)</b> | <b>Placebo<br/>(n = 423)</b> |
|--------------------------------------------------|---------------------------------|------------------------------|
| Concomitant condition(s), n (%)                  | 605 (94.8)                      | 388 (91.7)                   |
| Most frequent concomitant conditions, n (%)*     |                                 |                              |
| Hypertension                                     | 276 (43.3)                      | 174 (41.1)                   |
| Gastresophageal reflux disease                   | 147 (23.0)                      | 101 (23.9)                   |
| Hypercholesterolemia                             | 87 (13.6)                       | 71 (16.8)                    |
| Diabetes mellitus                                | 88 (13.8)                       | 49 (11.6)                    |
| Osteoarthritis                                   | 73 (11.4)                       | 52 (12.3)                    |
| Hyperlipidemia                                   | 86 (13.5)                       | 38 (9.0)                     |
| Benign prostatic hyperplasia                     | 54 (8.5)                        | 45 (10.6)                    |
| Coronary artery disease                          | 45 (7.1)                        | 43 (10.2)                    |
| Treatment with ≥1 therapy, n (%)                 | 567 (88.9)                      | 359 (84.9)                   |
| Most frequent therapies, n (%) <sup>†</sup>      |                                 |                              |
| P-Glycoprotein inhibitor <sup>‡</sup>            | 313 (49.1)                      | 188 (44.4)                   |
| Proton pump inhibitor and H2-receptor antagonist | 244 (38.2)                      | 162 (38.3)                   |
| Anti-platelet <sup>§</sup>                       | 189 (29.6)                      | 118 (27.9)                   |
| Systemic corticoid <sup>  </sup>                 | 136 (21.3)                      | 89 (21.0)                    |
| Bronchodilator                                   | 129 (20.2)                      | 72 (17.0)                    |

\*Concomitant conditions reported in >10% of patients in either treatment group at baseline, by preferred term.

<sup>†</sup>Relevant therapies used by >10% of patients in either treatment group at baseline, by special search category using the World Health Organisation Drug Dictionary.

<sup>‡</sup>Special search category 'P-Glycoprotein inhibitor' includes therapies such as omeprazole, simvastatin and atorvastatin.

<sup>§</sup>Prophylactic use of anti-platelet therapy was permitted (e.g., acetylsalicylic acid  $\leq 325$  mg/day, clopidogrel 75 mg/day, or equivalent doses of other therapies).

<sup>||</sup>Concomitant therapy with prednisone  $\leq 15$  mg/day, or the equivalent, was permitted if the dose had been stable for  $\geq 8$  weeks before screening.
