# Supplementary material for: Safety, tolerability and appropriate use of nintedanib in idiopathic pulmonary fibrosis
Source: Springer Nature journal article supplement (doi:10.1186/s12931-015-0276-5), 2015-09-24
Supplement: MOESM2 [file 9759792]

## Safety, tolerability and appropriate use of nintedanib in idiopathic pulmonary fibrosis

### Additional files

Additional file 2

Cardiac disorders and ischemic heart disease in the INPULSIS® trials

Table

| <b>N (%)</b>                            | <b>Nintedanib<br/>(n = 638)</b> | <b>Placebo<br/>(n = 423)</b> |
|-----------------------------------------|---------------------------------|------------------------------|
| Cardiac disorder adverse events         | 64 (10.0)                       | 45 (10.6)                    |
| Serious cardiac disorder adverse events | 32 (5.0)                        | 23 (5.4)                     |
| Fatal cardiac disorders                 | 3 (0.5)                         | 6 (1.4)                      |
| Ischemic heart disease                  | 27 (4.2)                        | 17 (4.0)                     |
| Myocardial infarction                   | 17 (2.7)                        | 5 (1.2)                      |
| Myocardial infarction                   | 7 (1.1)                         | 2 (0.5)                      |
| Acute myocardial infarction             | 3 (0.5)                         | 0 (0.0)                      |
| Blood creatine phosphokinase increase   | 5 (0.8)                         | 3 (0.7)                      |
| ECG Q-wave abnormal                     | 1 (0.2)                         | 0 (0.0)                      |
| Coronary artery occlusion               | 1 (0.2)                         | 0 (0.0)                      |
| Other ischemic heart disease            | 11 (1.7)                        | 13 (3.1)                     |
| Coronary artery disease                 | 5 (0.8)                         | 3 (0.7)                      |
| Angina pectoris                         | 2 (0.3)                         | 5 (1.2)                      |
| Coronary angioplasty                    | 1 (0.2)                         | 0 (0.0)                      |
| Coronary artery stenosis                | 2 (0.3)                         | 3 (0.7)                      |
| Myocardial ischemia                     | 0 (0.0)                         | 3 (0.7)                      |
| Coronary artery stent insertion         | 1 (0.2)                         | 0 (0.0)                      |
| ECG ST segment depression               | 1 (0.2)                         | 0 (0.0)                      |

“Ischemic heart disease” is a standardized MedDRA query (SMQ), comprising the subordinate SMQs “myocardial infarction” and “other ischemic heart disease”.
